# Supplementary material for: Two nickel-added poly(polyoxometalate)s built of Keggin-type {Ni6PW9} and Anderson-type NiW6O24via WO4/Sb2O bridges and Ni–O–W linkages with efficient hydrogen evolution activity
Source: Royal Society of Chemistry journal article supplement (doi:10.1039/d4dt00928b), 2024-01-01
Supplement: d4dt00928b1.pdf [file d4dt00928b1.pdf]

## ***Electronic Supplementary Information***

Two Nickel-Added Poly(polyoxometalate)s Built by Keggin-Type  $\{\text{Ni}_6\text{PW}_9\}$   
and Anderson-Type  $\text{NiW}_6\text{O}_{24}$  via  $\text{WO}_4/\text{Sb}_2\text{O}$  Bridges and Ni–O–W Linkages  
with Efficient Hydrogen Evolution Activity

*Peng-Yun Zhang, Chen Lian, Zhen-Wen Wang, Juan Chen, Hongjin Lv\* and Guo-Yu Yang\**

*MOE Key Laboratory of Cluster Science, School of Chemistry and Chemical Engineering, Beijing  
Institute of Technology, Beijing 102488.*

*\*Corresponding Author(s): Guo-Yu Yang: [ygy@bit.edu.cn](mailto:ygy@bit.edu.cn); Hongjin Lv: [hly@bit.edu.cn](mailto:hly@bit.edu.cn)*

## Table of Contents

**Fig. S1.** (a) The structural unit and (b) asymmetrical unit of **1**.

**Fig. S2** (a) The **Ni<sub>6</sub>-1** cluster of **1**. (b) The **Ni<sub>6</sub>-2** cluster of **1**.

**Fig. S3** (a) The distance between **Ni<sub>6</sub>-1** and **Ni<sub>6</sub>-2** units of **1**. (b) The diameter of the Anderson-type cluster of **1**.

**Fig. S4.** The structural unit of **2**.

**Fig. S5** The SHG oscilloscope traces signals of KDP and compound **2** in the same powder particle size (75–106  $\mu\text{m}$ ).

**Fig. S6.** The comparison of 1 mg of compounds **1** and **2** used for H<sub>2</sub> evolution. Conditions: white light (10 W, 400–800 nm), 0.3 mM [Ir(coumarin)<sub>2</sub>(dtbbpy)]<sup>+</sup>, 0.2 M TEOA, 2.5 M H<sub>2</sub>O, 6 mL DMF/CH<sub>3</sub>CN (v/v, 3:1) degassed with Ar/CH<sub>4</sub> (v/v, 4:1).

**Fig. S7.** The (a) IR Spectra and (b) PXRD patterns of catalyst **2** including freshly synthesized samples and samples immersed into different acidic/alkaline solutions and organic solvents for 24 h.

**Fig. S8.** The cyclic experiments for H<sub>2</sub> evolution with 2 mg of catalyst **2**. Conditions: white light (10 W, 400–800 nm), 0.3 mM [Ir(coumarin)<sub>2</sub>(dtbbpy)]<sup>+</sup>, 0.2 M TEOA, 2.5 M H<sub>2</sub>O, 6 mL DMF/CH<sub>3</sub>CN (v/v, 3:1) degassed with Ar/CH<sub>4</sub> (v/v, 4:1), reaction time: 5 h.

**Fig. S9.** The (a) IR Spectra and (b) PXRD patterns of **2** before and after catalysis.

**Fig. S10.** The XPS full survey spectra of compound **2** before and after catalysis.

**Fig. S11.** The IR spectra of (a) **1** and (b) **2**.

**Fig. S12.** Simulated and experimental PXRD patterns of (a) **1** and (b) **2**.

**Fig. S13.** The thermogravimetric analyses of compounds **1** and **2**.

**Fig. S14.** The UV–Vis diffuse-reflectance spectra and (inset) the UV–Vis plots of Kubelka–Munk function versus energy E (eV) of compounds (a) **1** and (b) **2**.

**Table S1.** The BVS values of all Ni atoms and some selected O atoms in the compound **1**.

**Table S2.** Summary of some POM-based heterogeneous catalysts for H<sub>2</sub> evolution.

## Experimental Procedures

**Materials and Instruments.** The precursor  $\text{Na}_9[\text{A-}\alpha\text{-PW}_9\text{O}_{34}]\cdot 7\text{H}_2\text{O}$  and the photosensitizer  $[\text{Ir}(\text{coumarin})_2\text{(dtbbpy)}]^+$  were prepared as literature reported.<sup>1,2</sup> All other chemicals with analytical grade utilized in this work were commercially obtained. SHG measurements were performed on a Q-switched Nd:YAG laser (1064 nm). Powder X-ray diffraction (PXRD) patterns were obtained by employing a Bruker D8 Advance diffractometer (Cu  $K\alpha$  radiation,  $\lambda=1.54056 \text{ \AA}$ ). IR spectra were tested by a Nicolet iS10 FT-IR spectrometer with the wavenumber varying from 4000 to 400  $\text{cm}^{-1}$ . The X-ray photoelectron spectroscopy (XPS) was measured by a PHI VersaProbe III device. Elemental analyses for C, H, and N were performed by a Perkin-Elmer 2400-II CHNS/O analyzer. ICP analyses of Ni, Sb, and W were conducted on a Perkin-Elmer Optima 2000 ICP-AES spectrometer. UV-Vis diffuse-reflectance spectra were collected on a Perkin-Elmer Lambda 750 S spectrometer. TG analyses were recorded on a Mettler Toledo instrument from 25 to 700 °C.

**X-ray Crystallography.** The size-suitable and high-quality single crystals of **1** and **2** were picked out and stuck to the top of glass thread for collecting diffraction data on the Bruker APEX II CCD detector (Mo  $K\alpha$  radiation,  $\lambda=0.71073 \text{ \AA}$ ) at room temperature. In the OLEX2 interface, the structures of **1** and **2** were determined by using the intrinsic phasing method through the ShelXT program and further refined by employing full-matrix least-squares on  $F^2$  through the SHELXL program.<sup>3-5</sup> In the process of refinement, all non-hydrogen atoms of **1** and **2** were refined anisotropically, respectively. The hydrogen atoms attached to carbon and nitrogen atoms were geometrically placed and refined isotropically by using a riding model. The effect of disordered solvent molecules on the overall intensity data of the structures was processed by the Solvent Mask in the OLEX2 interface.<sup>6</sup> The “OMIT” commands were used to omit both weak diffraction data above 50 degrees and low-quality diffraction data with significant deviations for **1** and **2**. For compound **1**, the largest residual electron density peak is 5.27  $\text{e}\cdot\text{\AA}^{-3}$ , with the Q-peak located extremely close to the N4 atom at an unreasonable position, leading to its non-attribution. According to the Fourier maps, 22 and 5 lattice water molecules (electron density peak  $> 5 \text{ e}\cdot\text{\AA}^{-3}$ ) have been found for compounds **1** and **2**, respectively. There were numerous short connections between O(water)...O, indicating extensive H-bonding interactions between them, alongside the high disorder of lattice water molecules within the channels of framework. In addition, there were some residual electron density peaks below 5  $\text{e}\cdot\text{\AA}^{-3}$  remaining unassigned, leading to ambiguities in the precise location and quantity of lattice water molecules. Importantly, however, the absence of definitive attribution for these residual peaks does not compromise the accuracy of the final model for **1** and **2**. Based on the potential electron counts and solvent-accessible voids from the Solvent Mask reports, 17 and 40 lattice water molecules should be additionally added for **1** and **2**, respectively, and further verified by elemental analyses and TGA. The Flack factor of 0.33 for compound **2** is attributed to the presence of two different configurations in the structure, resulting in partial internal racemization.

**Photocatalytic Hydrogen Evolution Experiments.** The experiments were carried out in a mixed DMF/ $\text{CH}_3\text{CN}$  (6 ml, v/v, 3/1) solution containing **1** or **2** as catalysts, 0.3 mM  $[\text{Ir}(\text{coumarin})_2(\text{dtbbpy})]^+$  as photosensitizer, 0.2 M triethanolamine (TEOA) as sacrificial electron donor, 2.5 M  $\text{H}_2\text{O}$  as proton source. The solution was degassed with  $\text{Ar}/\text{CH}_4$  (v/v, 4/1) and the quartz photocatalytic reactor was placed in the multichannel photochemical reaction system of the Beijing Perfectlight PCX-50C instrument. Then illuminated by a white-light source (10 W,  $\lambda = 400\text{--}800 \text{ nm}$ ), and the reaction temperature was adjusted at 25 °C by a low-temperature thermostat bath. The

gas samples were analyzed by GC979011 gas chromatograph equipped with TCD and 5 Å molecular sieve column (3 m × 3 mm) with argon gas as carrier gas and quantified based on the internal CH<sub>4</sub> standard.

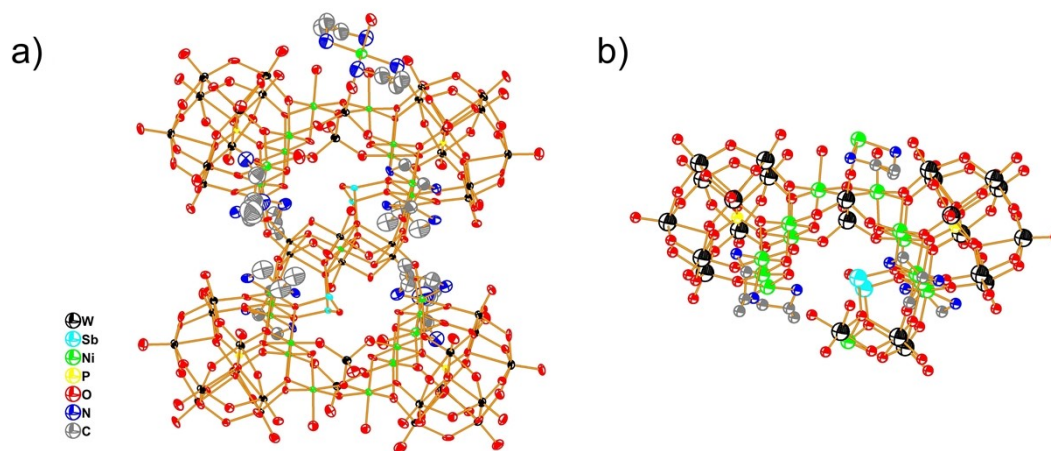

Fig. S1. (a) The structural unit and (b) asymmetrical unit of 1.

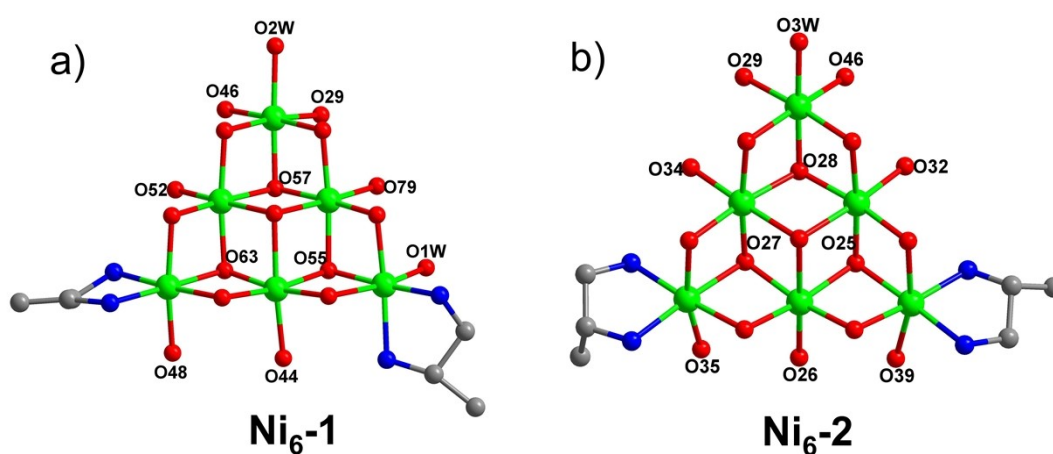

Fig. S2 (a) The Ni<sub>6</sub>-1 cluster of 1. (b) The Ni<sub>6</sub>-2 cluster of 1.

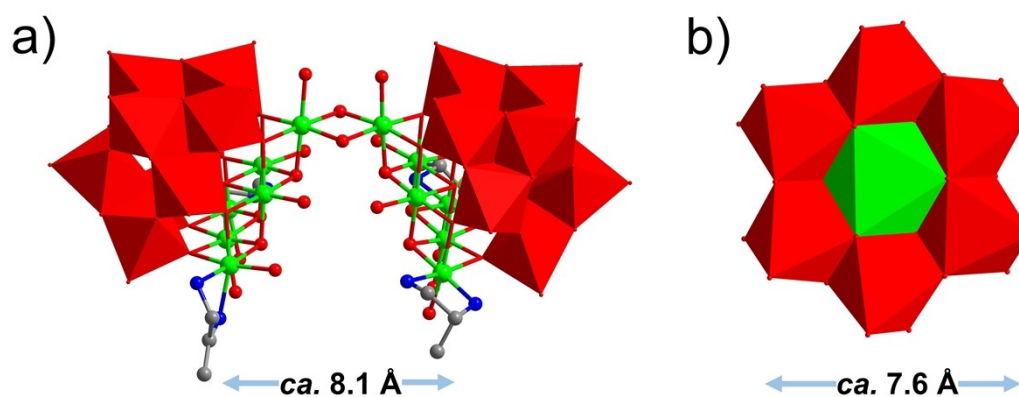

Fig. S3 (a) The distance between Ni<sub>6</sub>-1 and Ni<sub>6</sub>-2 units of 1. (b) The diameter of the Anderson-type cluster of 1.

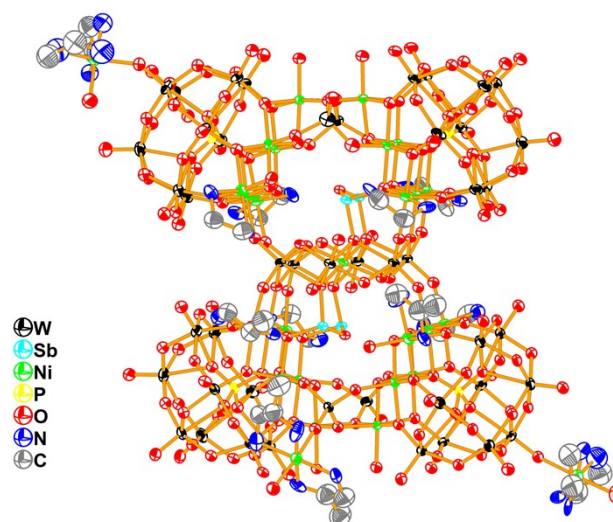

Fig. S4. The structural unit of **2**.

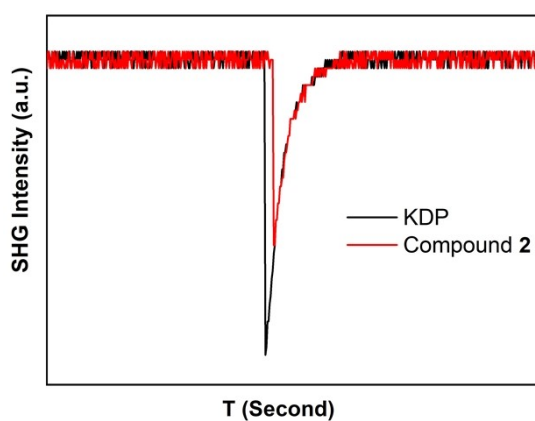

Fig. S5 The SHG oscilloscope traces signals of KDP and compound **2** in the same powder particle size (75–106  $\mu\text{m}$ ).

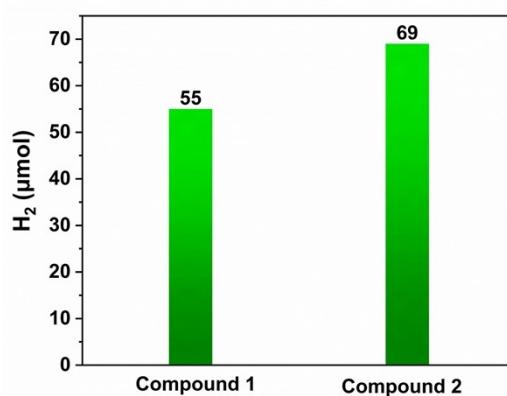

Fig. S6. The comparison of 1 mg of compounds **1** and **2** used for H<sub>2</sub> evolution. Conditions: white light (10 W, 400–800 nm), 0.3 mM [Ir(coumarin)<sub>2</sub>(dtbbpy)]<sup>+</sup>, 0.2 M TEOA, 2.5 M H<sub>2</sub>O, 6 mL DMF/CH<sub>3</sub>CN (v/v, 3:1) degassed with Ar/CH<sub>4</sub> (v/v, 4:1).

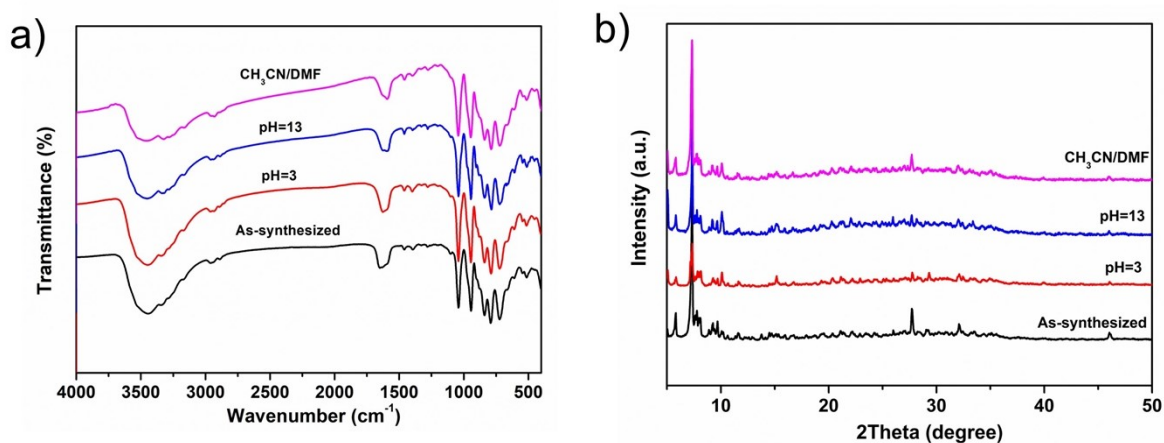

**Fig. S7.** The (a) IR Spectra and (b) PXRD patterns of catalyst **2** including freshly synthesized samples and samples immersed into different acidic/alkaline solutions and organic solvents for 24 h.

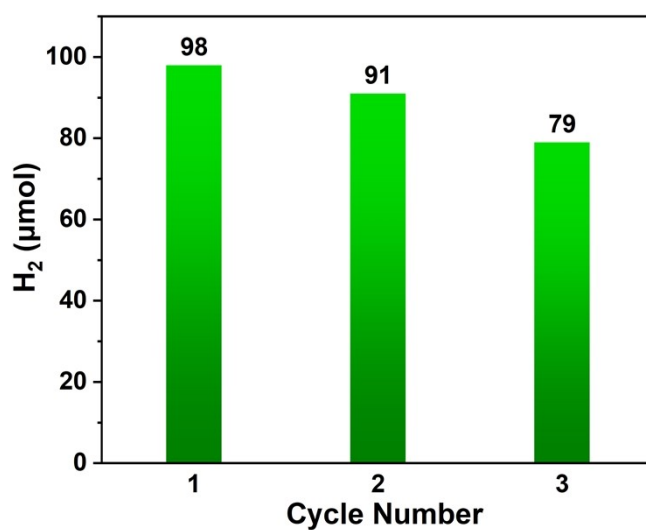

**Fig. S8.** The cyclic experiments for H<sub>2</sub> evolution with 2 mg of catalyst **2**. Conditions: white light (10 W, 400–800 nm), 0.3 mM [Ir(coumarin)<sub>2</sub>(dtbbpy)]<sup>+</sup>, 0.2 M TEOA, 2.5 M H<sub>2</sub>O, 6 mL DMF/CH<sub>3</sub>CN (v/v, 3:1) degassed with Ar/CH<sub>4</sub> (v/v, 4:1), reaction time: 5 h.

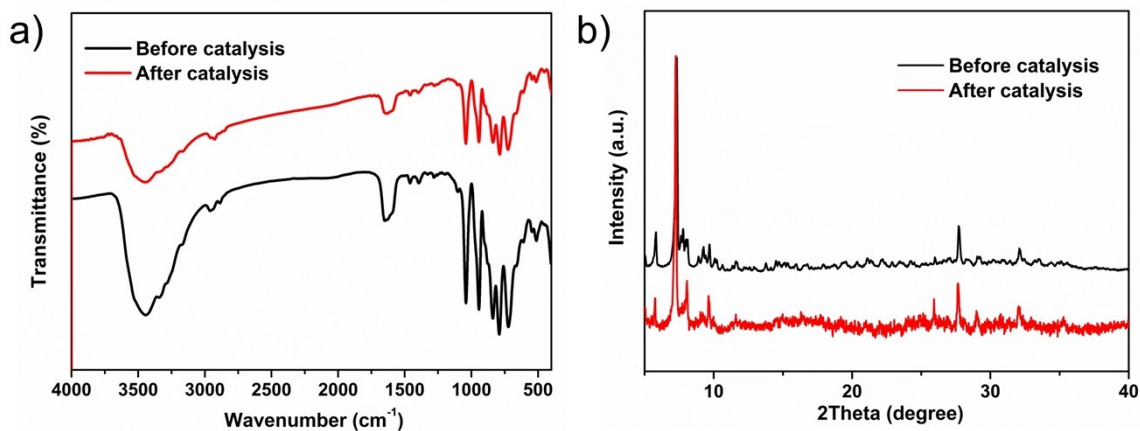

**Fig. S9.** The (a) IR Spectra and (b) PXRD patterns of **2** before and after catalysis.

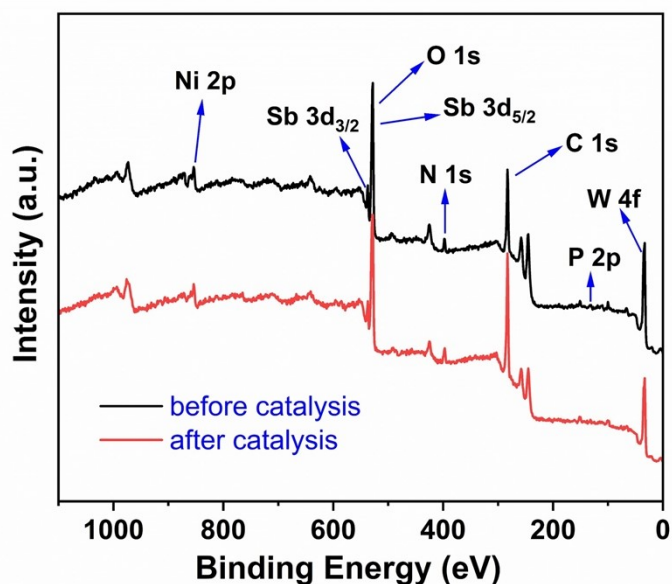

Fig. S10. The XPS full survey spectra of compound **2** before and after catalysis.

**IR spectra.** As shown in Fig. S11, characteristic absorption peaks can be observed at 1046, 949, 845–793, 722  $\text{cm}^{-1}$  for compound **1** and 1040, 943, 835–792, 725  $\text{cm}^{-1}$  for compound **2**, which are attributed to  $\nu(\text{P-O})$ ,  $\nu(\text{W-O}_t)$ ,  $\nu(\text{W-O}_b)$  and  $\nu(\text{W-O}_c)$  respectively, indicating the existence of  $[\text{B-}\alpha\text{-PW}_9\text{O}_{34}]^{9-}$  fragments. The stretching and bending vibration peaks attributed to  $-\text{OH}$  can be seen at 3446  $\text{cm}^{-1}$ , 1622  $\text{cm}^{-1}$  for compound **1** and 3450  $\text{cm}^{-1}$ , 1636  $\text{cm}^{-1}$  for compound **2**, respectively. In addition, the characteristic peaks observed at 2925  $\text{cm}^{-1}$ , 1464–1403  $\text{cm}^{-1}$  for compound **1**, and 2950  $\text{cm}^{-1}$ , 1458–1391  $\text{cm}^{-1}$  for compound **2** are attributed to  $-\text{NH}_2$  and  $-\text{CH}_2$  of organic amine.

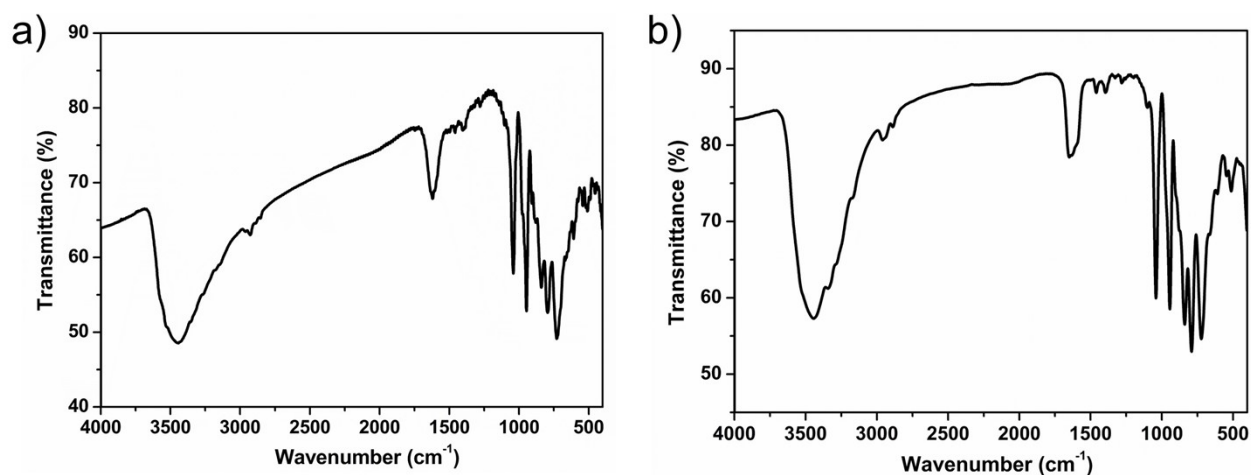

Fig. S11. The IR spectra of (a) **1** and (b) **2**.

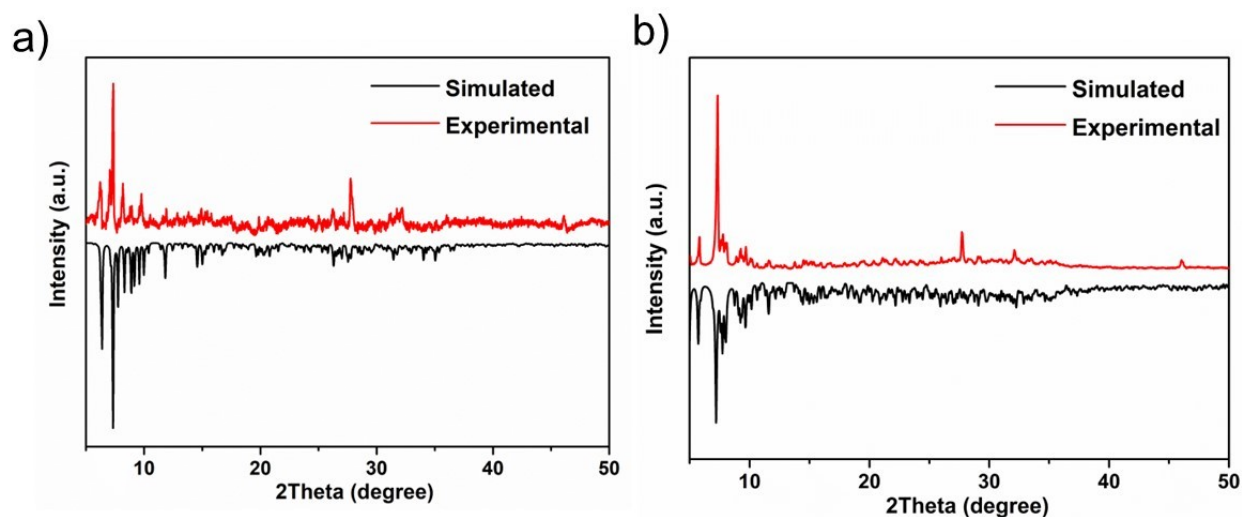

Fig. S12. Simulated and experimental PXRD patterns of (a) **1** and (b) **2**.

**Thermogravimetric analyses.** To evaluate the thermal stability of compounds **1** and **2**, the thermogravimetric analyses were tested from 25 to 700 °C (Fig. S13). The weight loss of both compounds can be regarded as a continuous process. From 25 to 640 °C, the reduction of 14.27% for the mass of compound **1** was attributed to the loss of 31 adsorbed water molecules, 39 lattice water molecules, 6 coordination water molecules, 10 enMe molecules and the dehydration of 8 protons (4 H<sub>2</sub>O) and 8 OH<sup>-</sup> groups (4 H<sub>2</sub>O). The mass of compound **2** was reduced by 12.84% (calc. 12.95%) from 25 to 645 °C due to the loss of 45 lattice water molecules, 9 coordination water molecules, 10 en molecules, 4 enMe molecules and the dehydration of 9 protons (4.5 H<sub>2</sub>O) and 8 OH<sup>-</sup> groups (4 H<sub>2</sub>O).

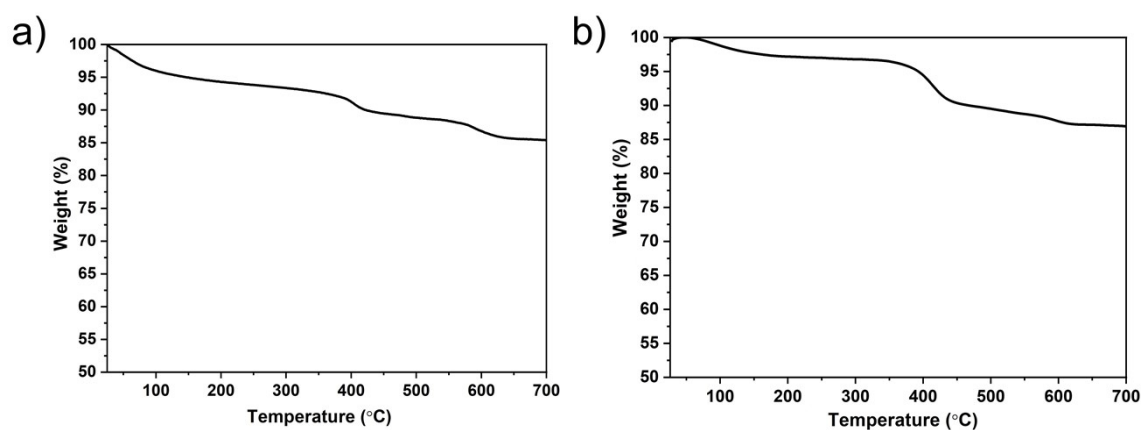

Fig. S13. The thermogravimetric analyses of compounds **1** and **2**.

**Optical Band gaps.** Fig. S14 shows the solid UV–vis diffuse-reflectance spectra of compounds **1** and **2** recorded from 200 to 800 nm. The ratio of  $\alpha/S$  ( $\alpha$  represents absorption coefficient,  $S$  represents scattering coefficient) was obtained according to the Kubelka–Munk formula:  $\alpha/S = F(R) = (1-R)^2/(2R)$ .<sup>7</sup> The band gap values of **1** and **2** were 3.41 and 3.32 eV, respectively, revealing the properties of semiconductors. The band gap values of **1** and **2** are similar to that of the reported NiAPs, such as  $[\text{Ni}(\text{enMe})_2(\text{H}_2\text{O})_2][\text{Ni}_6(\mu_3\text{-OH})_3(\text{H}_2\text{O})_4(\text{enMe})_3(\text{CH}_3\text{COO})\text{-}(\text{B-}\alpha\text{-PW}_9\text{O}_{34})]_2 \cdot 10\text{H}_2\text{O}$  ( $E_g=3.75$  eV) and  $[\text{Ni}_6(\mu_3\text{-OH})_3(\text{H}_2\text{O})_2(\text{dien})_3(\text{B-}\alpha\text{-PW}_9\text{O}_{34})] \cdot 4\text{H}_2\text{O}$  ( $E_g=3.66$  eV).<sup>8</sup>



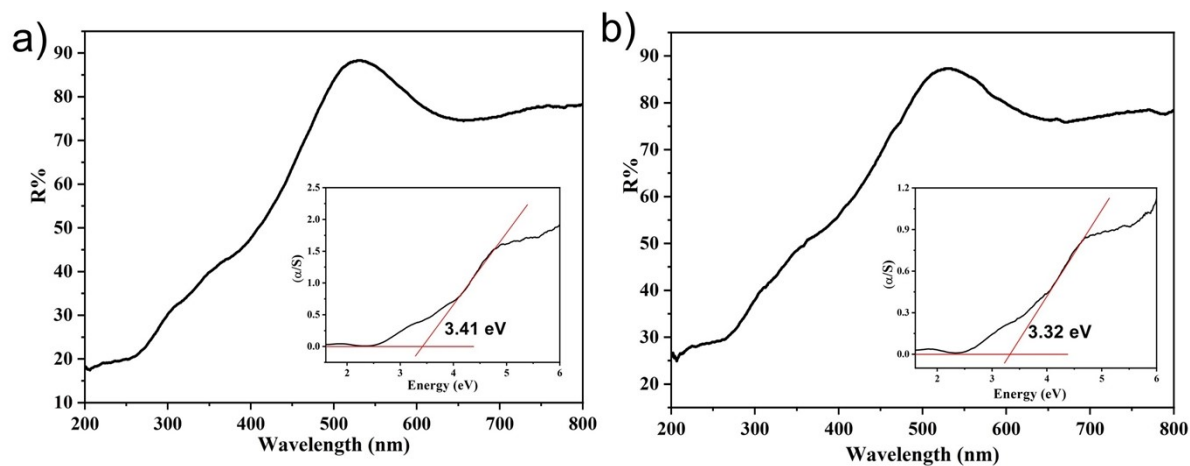

**Fig. S14.** The UV–Vis diffuse-reflectance spectra and (inset) the UV–Vis plots of Kubelka–Munk function versus energy  $E$  (eV) of compounds (a) **1** and (b) **2**.

**Table S1.** The BVS values of all Ni atoms and some selected O atoms in the compound **1**.

| Atom1 | Atom2            | Bond length (Å) | Bond valence sum (BVS) | Atom1 | Atom2            | Bond length (Å) | Bond valence sum (BVS) |
|-------|------------------|-----------------|------------------------|-------|------------------|-----------------|------------------------|
| Ni1   | O41              | 2.107           | 1.99                   | Ni8   | N1               | 2.069           | 1.95                   |
| Ni1   | O41 <sup>1</sup> | 2.107           |                        | Ni8   | N2               | 2.102           |                        |
| Ni1   | O43              | 2.027           |                        | Ni8   | O48 <sup>1</sup> | 2.034           |                        |
| Ni1   | O43 <sup>1</sup> | 2.027           |                        | Ni8   | O58              | 2.110           |                        |
| Ni1   | O45              | 2.058           |                        | Ni8   | O59              | 2.181           |                        |
| Ni1   | O45 <sup>1</sup> | 2.058           |                        | Ni8   | O63              | 2.035           |                        |
| Ni2   | O25              | 2.061           | 1.84                   | Ni9   | O28              | 1.991           | 2.00                   |
| Ni2   | O26              | 2.093           |                        | Ni9   | O29              | 2.107           |                        |
| Ni2   | O27              | 2.053           |                        | Ni9   | O31              | 2.098           |                        |
| Ni2   | O30              | 2.265           |                        | Ni9   | O37              | 2.065           |                        |
| Ni2   | O36              | 2.061           |                        | Ni9   | O46              | 2.082           |                        |
| Ni2   | O40              | 2.057           |                        | Ni9   | O3W              | 2.030           |                        |
| Ni3   | O52              | 2.088           | 2.01                   | Ni10  | N5               | 2.070           | 1.99                   |
| Ni3   | O56              | 2.066           |                        | Ni10  | N6               | 2.067           |                        |
| Ni3   | O57              | 2.020           |                        | Ni10  | O25              | 2.083           |                        |
| Ni3   | O58              | 2.017           |                        | Ni10  | O33              | 2.152           |                        |
| Ni3   | O63              | 2.012           |                        | Ni10  | O39              | 2.041           |                        |
| Ni3   | O65              | 2.172           |                        | Ni10  | O40              | 2.070           |                        |
| Ni4   | N7               | 2.064           | 1.99                   | Ni11  | N3               | 2.094           | 1.90                   |
| Ni4   | N8               | 2.073           |                        | Ni11  | N4               | 2.079           |                        |
| Ni4   | O27              | 2.088           |                        | Ni11  | O55              | 2.042           |                        |
| Ni4   | O35              | 2.003           |                        | Ni11  | O64              | 2.184           |                        |

|     |                  |       |      |      |                  |       |      |
|-----|------------------|-------|------|------|------------------|-------|------|
| Ni4 | O36              | 2.139 |      | Ni11 | O66              | 2.077 |      |
| Ni4 | O38              | 2.122 |      | Ni11 | O1W              | 2.114 |      |
| Ni5 | O44 <sup>1</sup> | 2.109 | 1.88 | Ni12 | O29              | 2.057 | 2.01 |
| Ni5 | O55              | 2.024 |      | Ni12 | O46              | 2.057 |      |
| Ni5 | O59              | 2.073 |      | Ni12 | O56              | 2.045 |      |
| Ni5 | O63              | 2.021 |      | Ni12 | O57              | 2.033 |      |
| Ni5 | O64              | 2.079 |      | Ni12 | O67              | 2.063 |      |
| Ni5 | O65              | 2.224 |      | Ni12 | O2W              | 2.096 |      |
| Ni6 | O55              | 2.026 |      | 2.02 | Ni13             | O27   |      |
| Ni6 | O57              | 2.002 | Ni13 |      | O28              | 2.011 |      |
| Ni6 | O65              | 2.172 | Ni13 |      | O30              | 2.146 |      |
| Ni6 | O66              | 2.037 | Ni13 |      | O34              | 2.050 |      |
| Ni6 | O67              | 2.060 | Ni13 |      | O37              | 2.053 |      |
| Ni6 | O79              | 2.069 | Ni13 |      | O38              | 2.041 |      |
| Ni7 | O25              | 2.057 | 2.01 | Ni14 | N9               | 2.135 | 1.89 |
| Ni7 | O28              | 2.005 |      | Ni14 | N9 <sup>2</sup>  | 2.135 |      |
| Ni7 | O30              | 2.168 |      | Ni14 | N10              | 2.094 |      |
| Ni7 | O31              | 2.055 |      | Ni14 | N10 <sup>2</sup> | 2.094 |      |
| Ni7 | O32              | 2.062 |      | Ni14 | O54 <sup>2</sup> | 2.110 |      |
| Ni7 | O33              | 2.028 |      | Ni14 | O54              | 2.110 |      |
| O25 | Ni2              | 2.061 | 2.01 | O55  | Ni5              | 2.024 | 1.08 |
| O25 | Ni7              | 2.057 |      | O55  | Ni6              | 2.026 |      |
| O25 | Ni10             | 2.083 |      | O55  | Ni11             | 2.042 |      |
| O25 | Sb2              | 1.963 |      | O57  | Ni3              | 2.020 | 1.12 |
| O27 | Ni2              | 2.053 | 2.02 | O57  | Ni6              | 2.002 |      |
| O27 | Ni4              | 2.088 |      | O57  | Ni12             | 2.033 |      |
| O27 | Ni13             | 2.043 |      | O63  | Ni3              | 2.012 | 1.11 |
| O27 | Sb1              | 1.965 |      | O63  | Ni5              | 2.021 |      |
| O28 | Ni7              | 2.005 | 1.17 | O63  | Ni8              | 2.035 |      |
| O28 | Ni9              | 1.991 |      |      |                  |       |      |
| O28 | Ni13             | 2.011 |      |      |                  |       |      |

**Table S2.** Summary of some POM-based heterogeneous catalysts for H<sub>2</sub> evolution.

| Catalyst formula                                                                                                                                                  | Photosensitizer | co-catalyst | Sacrificial electron donor | light                    | Activity (μmol g <sup>-1</sup> h <sup>-1</sup> ) |
|-------------------------------------------------------------------------------------------------------------------------------------------------------------------|-----------------|-------------|----------------------------|--------------------------|--------------------------------------------------|
| $\text{K}_8\text{Na}_8\text{H}_4[\text{P}_8\text{W}_{60}\text{Ta}_{12}(\text{H}_2\text{O})_4(\text{OH})_8\text{O}_{236}] \cdot 42\text{H}_2\text{O}$ <sup>9</sup> | None            | Pt          | CH <sub>3</sub> OH         | 250W Hg lamp             | 1250                                             |
| $\text{Cs}_{10.5}\text{K}_4\text{H}_{5.5}[\text{Ta}_4\text{O}_6(\text{SiW}_9\text{Ta}_3\text{O}_{40})_4] \cdot 30\text{H}_2\text{O}$ <sup>9</sup>                 |                 |             |                            |                          | 803                                              |
| $\text{K}_6\text{SiW}_{11}\text{O}_{39}\text{Ni}(\text{H}_2\text{O}) \cdot 15\text{H}_2\text{O}$ <sup>10</sup>                                                    | None            | Pt          | zinc powders               | 500 W Xe lamp (λ>400 nm) | 98                                               |
| $\text{K}_6\text{SiW}_{11}\text{O}_{39}\text{Co}(\text{H}_2\text{O}) \cdot 14\text{H}_2\text{O}$ <sup>10</sup>                                                    |                 |             |                            |                          | 65                                               |
| $\text{K}_6\text{SiW}_{11}\text{O}_{39}\text{Cu}(\text{H}_2\text{O}) \cdot 14\text{H}_2\text{O}$ <sup>10</sup>                                                    |                 |             |                            |                          | 150                                              |

|                                                                                                      |                                     |      |                                                    |                                      |         |
|------------------------------------------------------------------------------------------------------|-------------------------------------|------|----------------------------------------------------|--------------------------------------|---------|
| $K_6SiW_{11}O_{39}Zn(H_2O) \cdot 15H_2O$ <sup>10</sup>                                               |                                     |      |                                                    |                                      | 48      |
| $[Cu^{I}_{12}(trz)_8(H_2O)_2] \cdot [\alpha-SiW_{12}O_{40}] \cdot 2H_2O$ <sup>11</sup>               | None                                | Pt   | CH <sub>3</sub> OH                                 | 300 W Xe lamp                        | 192.2   |
| $Na_8Ta_6O_{19}/Cd_{0.7}Zn_{0.3}S$ <sup>12</sup>                                                     | None                                | None | Na <sub>2</sub> S/Na <sub>2</sub> S O <sub>3</sub> | 300 W Xe lamp                        | 43050   |
| $[Cu(en)_2]_6\{[Cu(en)_2]@[Cu_2(trz)_2(en)_2]_6[H_{10}Nb_{68}O_{188}]\}$ <sup>13</sup>               | $[Ir(ppy)_2(dtbbpy)][PF_6]$         | None | TEOA                                               | 300 W Xe lamp ( $\lambda > 420$ nm)  | 381     |
| $[Cu^{II}_5(2-ptz)_6(H_2O)_4(GeW_{12}O_{40})] \cdot 4H_2O$ <sup>14</sup>                             | None                                | None | CH <sub>3</sub> OH                                 | Xe lamp                              | 3813    |
| $[Cu^I_2(ppz)_4][H_2GeW_{12}O_{40}] \cdot 8H_2O$ <sup>14</sup>                                       |                                     |      |                                                    |                                      | 500     |
| $Cu_8(H_2O)_2(en)_4(B-\alpha-H_2-SiW_9O_{34})_2$ <sup>15</sup>                                       | $[Ir(ppy)_2(dtbbpy)][PF_6]$         | None | TEOA                                               | LED light (450 nm)                   | 833.33  |
| $[Ni(H_2O)_6]KH[NiMo_6O_{24}(Sb_3O_3)_2] \cdot 5H_2O$ <sup>16</sup>                                  | $[Ir(\text{coumarin})_2(dtbbpy)]^+$ | None | TEOA                                               | 300 W Xe lamp (400 nm cutoff filter) | 10358   |
| $H_3[(btc)Ni_6(\mu_3-OH)_3(H_2O)_5(B-\alpha-PW_9O_{34})] \cdot 17H_2O$ <sup>17</sup>                 | $[Ir(ppy)_2(dtbbpy)][PF_6]$         | None | TEOA                                               | white light (400–800 nm, 5 W)        | 1058.24 |
| $H_6Na_8Cs_3[Co_9(\mu_3-OH)_3(H_2O)_6(HPO_4)_2(B-\alpha-PW_9O_{34})_3]Cl \cdot 40H_2O$ <sup>18</sup> | $[Ir(ppy)_2(dtbbpy)][PF_6]$         | None | TEOA                                               | white light (400–800 nm, 10 W)       | 1217.6  |
| Compound <b>2</b> (this work)                                                                        | $[Ir(\text{coumarin})_2(dtbbpy)]^+$ | None | TEOA                                               | white light (400–800 nm, 10 W)       | 19214   |

## References

- [1] P. J. Domaille, G. Hervéa, and A. Téazéa, *Inorganic Syntheses*, 1990, **27**, 96.
- [2] L. Qin, C. Y. Zhao, L. Y. Yao, H. B. Dou, M. Zhang, J. Xie, T. C. Weng, H. J. Lv and G. Y. Yang, *CCS Chem.*, 2022, **4**, 259.
- [3] O. V. Dolomanov, L. J. Bourhis, R. J. Gildea, J. A. K. Howard and H. Puschmann, *J. Appl. Cryst.*, 2009, **42**, 339.
- [4] G. M. Sheldrick, *Acta Cryst.*, 2015, **A71**, 3.
- [5] G. M. Sheldrick, *Acta Cryst.*, 2015, **C71**, 3.
- [6] B. Rees, L. Jenner and M. Yusupov, *Acta Cryst.*, 2005, **D61**, 1299.
- [7] W. M. Wendlandt and H. G. Hecht, *Reflectance Spectroscopy*, Interscience: New York, 1966.
- [8] S. T. Zheng, D. Q. Yuan, H. P. Jia, J. Zhang and G. Y. Yang, *Chem. Commun.*, 2007, **18**, 1858.
- [9] S. J. Li, S. M. Liu, S. X. Liu, Y. W. Liu, Q. Tang, Z. Shi, S. X. Ouyang and J. H. Ye, *J. Am. Chem. Soc.*, 2012, **134**, 19716.
- [10] Z. L. Wang, Y. Lu, Y. G. Li, S. M. Wang and E. B. Wang, *Chin. Sci. Bull.*, 2012, **57**, 2265.
- [11] X. X. Zhao, S. W. Zhang, J. Q. Yan, L. D. Li, G. J. Wu, W. Shi, G. M. Yang, N. J. Guan and P. Cheng, *Inorg. Chem.*, 2018, **57**, 5030.
- [12] X. J. Zhou, H. Yu, D. Zhao, X. C. Wang and S. T. Zheng, *Appl. Catal. B: Environ.*, 2019, **248**, 423.
- [13] Z. K. Zhu, Y. Y. Lin, H. Yu, X. X. Li and S. T. Zheng, *Angew. Chem. Int. Ed.*, 2019, **58**, 16864.

- [14] Q. B. Shen, C. J. Gómez-García, W. L. Sun, X. Y. Lai, H. J. Pang and H. Y. Ma, *Green Chem.*, 2021, **23**, 3104.
- [15] J. J. Sun, W. D. Wang, X. Y. Li, B. F. Yang and G. Y. Yang, *Inorg. Chem.*, 2021, **60**, 10459.
- [16] M. Z. Chi, H. J. Li, X. Xin, L. Qin, H. J. Lv and G. Y. Yang, *Inorg. Chem.*, 2022, **61**, 8467.
- [17] Z. W. Wang, Q. Zhao, C. A. Chen, J. J. Sun, H. J. Lv and G. Y. Yang, *Inorg. Chem.*, 2022, **61**, 7477.
- [18] Z. W. Wang and G. Y. Yang, *Molecules*, 2023, **28**, 664.
